1 **High-throughput functional analysis of CFTR and other apically**  
2 **localized channels in iPSC derived intestinal organoids**

3

4 Sunny Xia<sup>1,2,3</sup>, Zoltán Bozóky<sup>2</sup>, Onofrio Laselva<sup>2,4</sup>, Michelle Di Paola<sup>3</sup>, Saumel Ahmadi<sup>2,5</sup>, Jia Xin  
5 Jiang<sup>2</sup>, Amy Pitstick<sup>6</sup>, Chong Jiang<sup>1</sup>, Daniela Rotin<sup>1,7</sup>, Christopher N. Mayhew<sup>6</sup>, Nicola L.  
6 Jones<sup>1,3</sup>, Christine E. Bear<sup>2,3,7\*</sup>

7

8

9 1 Cell Biology, Hospital for Sick Children, Toronto, ON, Canada.

10 2 Molecular Medicine, Hospital for Sick Children, Toronto, ON, Canada.

11 3 Department of Physiology, University of Toronto, Toronto, ON, Canada.

12 4 Department of Medical and Surgical Sciences, University of Foggia, Foggia, Italy

13 5 Department of Neurology, Washington University in St. Louis, St. Louis, USA

14 6 Division of Developmental Biology, Cincinnati Children's Hospital Medical Center,  
15 Cincinnati, OH, USA.

16 7 Department of Biochemistry, University of Toronto, Toronto, ON, Canada.

17

18 \* Corresponding author at: Hospital for Sick Children, 686 Bay St., Room 20.9420, Toronto, ON,  
19 M5G 0A4, Canada. E-mail address: [bear@sickkids.ca](mailto:bear@sickkids.ca)

20 **Abstract:**

21

22 Induced Pluripotent Stem Cells (iPSCs) can be differentiated into epithelial organoids that  
23 recapitulate the relevant context for CFTR and enable testing of therapies targeting Cystic  
24 Fibrosis (CF)-causing mutant proteins. However, to date, CF-iPSC-derived organoids have only  
25 been used to study pharmacological modulation of mutant CFTR channel activity and not the  
26 activity of other disease relevant membrane protein constituents. In the current work, we  
27 describe a high-throughput, fluorescence-based assay of CFTR channel activity in iPSC-derived  
28 intestinal organoids and describe how this method can be adapted to study other apical  
29 membrane proteins. In these proof-of-concept studies, we show how this fluorescence-based  
30 assay of apical membrane potential can be employed to study CFTR and ENaC channels and  
31 an electrogenic acid transporter in the same iPSC-derived intestinal tissue. This multiparameter  
32 phenotypic platform promises to expand CF therapy discovery to include strategies to target  
33 multiple determinants of epithelial fluid transport.

34

35 **Introduction:**

36

37 There has been remarkable progress made in the use of patient tissue derived primary  
38 organoids for the *in-vitro* modeling of Cystic Fibrosis (CF) pathogenesis and testing of therapies  
39 targeting mutant CFTR. CFTR mutations (1-5), lead to the loss of CFTR expression and/or  
40 function as a phosphorylation-regulated anion channel at the cell surface. Three dimensional  
41 (3D) primary organoids have been used effectively to report CFTR-mediated fluid transport as  
42 swelling of their luminal cavities (2). Importantly, the rectal organoid model has been shown to  
43 recapitulate the genotype specific impact of CF-causing mutations on fluid secretion, while also  
44 enabling the ranking of therapeutic interventions targeting defective CFTR expression and  
45 function (2, 6). Organoid swelling has been shown to correlate with multiple clinical biomarkers  
46 of CF, such as Sweat Chloride Concentration and lung function FEV1 measurements (6). This  
47 demonstrates the relevance of patient derived organoids for *in vitro* assessment of patient  
48 specific responses to modulators that directly target mutant CFTR.

49

50 Luminal swelling is measured in outside-in 3D organoids that enclose the apical membrane in  
51 which CFTR is localized. To date, such 3D structures have not been useful for screening the  
52 activities of cation channels and electrogenic transporters implicated in net epithelial fluid  
53 absorption. In order to solve this problem, 2D monolayer cultures were generated from  
54 enzymatically dissociated rectal organoids to provide direct access to the apical membrane (7).  
55 While these 2D cultures enabled low-throughput electrophysiological assays of CFTR mediated  
56 chloride conductance, they did not reconstitute the native functional expression of ENaC, even  
57 though this channel is known to be expressed in the large intestine (7).

58

59 Merkert et al, developed 2D intestinal epithelial cultures from CF iPSCs and demonstrated the  
60 potential of this model for high throughput drug screening of novel CF therapies (5). In this case,  
61 a halide sensitive reporter protein (eYFP) was genetically integrated into *CFTR* to enable  
62 studies of CFTR channel activity. However, to date, no similar strategy has been developed for  
63 the study of cation channels in iPSC (8).

64

65 Given the importance of ENaC and sodium-dependent transporters in modifying net epithelial  
66 fluid transport and maintaining epithelial barrier function, there is clearly a need for the  
67 development of robust models and assays to test these activities and their modulation. Both of

68 these membrane proteins constitute potential molecular targets for companion therapies to  
69 augment the impact of approved CFTR modulators drugs.

70

71 In the current work, we describe a method that enables the measurement of CFTR and ENaC  
72 activity in *opened* iPSC-derived intestinal organoids, a 2D preparation that retains 3D  
73 expression levels of both channels and is adaptable to medium-high throughput, high-content,  
74 phenotypic analyses.

75

## 76 **Results:**

### 77 **3D CF Human Intestinal Organoids (HIO) exhibit defective fluid secretion, which can be** 78 **restored through the use of CFTR modulators or gene editing.**

79 HIOs were differentiated from a homozygous F508del CF-iPSC line, and the isogenic Mutation-  
80 Corrected (MC) iPSCs harbouring Wt-CFTR using established protocols (9, 10) (Fig. 1a).

81 Immunostaining confirmed that the HIOs expressed CDX2, E-cadherin, and MUC2, proteins  
82 which are characteristic of intestinal epithelial cells (Fig. 1b). Non-CF (MC) iPSCs-derived HIOs  
83 exhibited an increase in size after activation by the adenylate cyclase agonist, Forskolin (Fsk),  
84 consistent with previously observed CFTR-mediated fluid secretion (2) (Fig. 1c, 1d). CF HIOs  
85 generated from iPSCs from a patient homozygous for the major CF-causing mutation, F508del,  
86 displayed defective forskolin mediated organoid swelling (Fig. 1c) These results are consistent  
87 with the known primary defects conferred by the F508del mutation related to defective CFTR  
88 protein processing and function and lack of organoid swelling in primary CF rectal organoids (2).  
89 However, the swelling iPSC HIOs organoids exhibits a slower kinetic profile compared to  
90 primary rectal organoids ( $n \geq 3$  biological replicates,  $n \geq 50$  organoids per biological replicate)  
91 (2).

92

93 In CF organoids, mutant F508del-CFTR protein misprocessing and function (measured as  
94 forskolin stimulated swelling) was rescued through pharmacological treatment with CFTR  
95 corrector, lumacaftor (VX-809) and acute potentiation with ivacaftor (VX-770) (11). Interestingly,  
96 the extent of rescued swelling in F508del CF HIOs was similar to that observed in mutation-  
97 corrected, Wt-CFTR expressing HIOs (Fig. 1c, 1d). This result was surprising given the  
98 relatively modest rescue effect (approximately 30% of Wt function) induced by this modulator  
99 combination in other *in vitro* models (2). Electrophysiological assays of CFTR modulator activity  
100 in 2D intestinal monolayers cultures are considered the “gold standard” for testing efficacy. Yet,  
101 these methods are relatively low throughput. Thus, we were prompted to develop a

102 complementary assay of CFTR that would enable direct measurement of F508del-CFTR  
103 channel modulation in the apical membrane of intestinal organoids, in a high-throughput format.

104

105 **Opened HIOs enable direct assessment of apical Wt-CFTR channel function in a high-**

106 **throughput format.** As previously demonstrated using primary mouse colonic organoids (12),

107 the removal of the matrigel led to splitting open and access to the apical membrane in 3D

108 organoids. We applied this method to the study of iPSC differentiated HIOs (Fig. 2a).

109 Immunofluorescence studies were conducted to confirm apical membrane location through

110 visualization of tight junction complex protein, Zona Occluden-1 (ZO-1) in the opened iPSC

111 HIOs (Fig. 2b). Further, *opened* organoids can be detected using the FLIPR® membrane

112 potential sensitive fluorescence, which could allow for direct functional assessment of apical

113 membrane protein (Fig. 2c). There were no significant differences in gene expression of CFTR,

114 ENaC, SLC6A14 (an electrogenic amino acid transporter) and other intestinal and epithelial cell

115 type markers in 3D when compared to 2D *opened* organoids (Fig 2d, Supplementary Fig. 1). In

116 addition, we confirmed mature CFTR expression in mutation corrected 3D HIOs and *opened*

117 HIOs (Fig. 2e).

118

119 After confirmation of CFTR protein expression, CFTR channel function was measured in

120 *opened* HIOs using the Apical Chloride Conductance (ACC) assay (Fig. 3a), as previously show

121 in mouse colonic organoids (12). The MC *opened* differentiated HIOs, which expressed Wt-

122 CFTR, demonstrated remarkably consistent Fsk responses (Fig. 3b). The ACC assay of *opened*

123 MC Wt-HIOs displayed a Fsk dose response with an EC<sub>50</sub> of 0.0287 μM (Fig. 3c), which is

124 lower compared to previously reported values in Fsk induced swelling of CF organoids (6). We

125 demonstrated that this assay is scalable to a high-throughput format, supporting its future utility

126 for testing emerging modulators. The *opened* HIOs showed excellent reproducibility of peak

127 response stimulation and consistent activation kinetics with Fsk stimulation and inhibition with

128 CFTRInh-172, reporting a Z' factor of 0.5294, supporting its utility as a robust assay of dynamic

129 CFTR function in a high throughput format (Fig. 3d, Supplementary Video 1).

130

131 **Opened CF organoids can model pharmacological rescue of F508del-CFTR with CF**

132 **modulators.** We were prompted to determine if the ACC assay is effective in detecting the

133 primary defect caused by the F508del mutation and evaluating the efficacy of clinical

134 modulators on *opened* CF HIOs (Fig. 4a). The *opened* F508del CF HIOs displayed no

135 significant fluorescence changes with Fsk stimulation, consistent with the expected defect in

136 F508del-CFTR channel function prior to modulator rescue (Fig. 4b). VX-809/VX-770 treatment  
137 resulted in partial rescue of the mutant F508del-CFTR protein. Furthermore, treatment with the  
138 new and highly effective modulator combination, VX-661, VX-445 and VX-770 (TRIKAFTA™)  
139 (13), restored F508del-CFTR function to approximately 50% of Wt-CFTR function in MC non-CF  
140 HIOs (Fig. 3b-3d).

141  
142 To determine if iPSC HIOs have the potential to identify companion therapies for CF, we  
143 assessed the effects of known modulators of PKA and PKG phosphorylation, since post-  
144 translational modifications of CFTR have been implicated in regulating modulator efficacy (Fig.  
145 4e) (14, 15). After partial correction of the trafficking defect in F508del with VX-809, *Opened*  
146 F508del CF HIOs were acutely potentiated with Fsk/VX-770 in combination with a nitric oxide  
147 (NO) agonist targeting enhancement of the PKG phosphorylation pathway (8cGMP or GSNO),  
148 which have been shown to augment VX-809 rescued F508del-CFTR activity (16, 17).  
149 Alternatively, *opened* F508del CF HIOs were treated with phosphodiesterase inhibitors  
150 (Milrinone or Tadalafil), which have been shown to be effective in stimulation of F508del-CFTR  
151 short circuit current in murine intestinal tissue (18). Milrinone addition, along with VX-809/VX-  
152 770, significantly increased the Fsk response to levels comparable to the triple modulator  
153 combination (VX-661/VX-445/VX-770) treatment (Fig. 4e-4f). Therefore, the ACC assay is  
154 sufficiently sensitive to distinguish between various modulator combinations that are expected to  
155 exhibit different efficacies in rescuing the functional expression of F508del-CFTR. With direct  
156 access to the apical membrane of HIOs in the *opened* format, this prompted us to determine  
157 whether functional output of other apical membrane channels can be detected. Since ENaC is  
158 functionally expressed in the intestinal epithelium (19), we tested the utility of the measuring  
159 ENaC mediated changes membrane potential in a high-throughput format.

160  
161 **Measurement of ENaC specific activity in MDCK overexpression cells.** We first developed  
162 an assay measuring ENaC function using an engineered cell line in which the three ENaC  
163 subunits were stably expressed. The renal epithelial MDCK cells, which is genetically  
164 engineered to express HA tagged- $\alpha$ ENaC, myc (& T7) tagged- $\beta$ ENaC, flag tagged- $\gamma$ ENaC and  
165 the un-transfected parental MDCK cell line (20) (Fig 5a). In order to measure constitutive ENaC  
166 function, we established an inward sodium gradient and assessed the effect of the ENaC  
167 inhibitors, amiloride and phenamil on the apical membrane of confluent differentiated, MDCK  
168 monolayers. Under these conditions, we predict that the apical membrane potential as  
169 monitored by the novel Apical Sodium Conductance (ASC) assay, would hyperpolarize upon

170 inhibition of ENaC with amiloride or phenamil (Fig. 5b). As expected, MDCK cells expressing  
171 tagged  $\alpha\beta\gamma$ ENaC, exhibited membrane hyperpolarization after addition of either amiloride or  
172 phenamil at 10 or 50  $\mu$ M concentrations in a sodium dependent manner (Fig. 5c, 5d,  
173 Supplementary Fig. 2). These responses were significantly greater in the MDCK cells  
174 expressing tagged  $\alpha\beta\gamma$ -ENaC than in the parental line.

175

176 **Function of ENaC and the sodium dependent transporter, SLC6A14 can be measured**  
177 ***opened* CF and Mutation Corrected (MC) HIOs.** We were then prompted to determine if  
178 ENaC function was measurable in *opened* HIOs using the assay developed above. Similar to  
179 the response measured in MDCK cells expressing ENaC, we found that amiloride (10  $\mu$ M)  
180 addition evoked a hyperpolarization response in *opened* HIOS (Fig. 6a, 6c). Furthermore, this  
181 response in *opened* HIOS was recapitulated using the amiloride analogue, phenamil (Fig. 6c)  
182 (21). Similar to ACC assay of CFTR channel function (Fig. 2d), the ASC based assay of ENaC  
183 function in *opened* iPSC differentiated HIOs showed excellent reproducibility and consistent  
184 amiloride response leading to a Z' factor of 0.573. Such parameters indicate the iPSC HIO  
185 model and ASC assay together provide an excellent candidate platform for monitoring dynamic  
186 and high throughput drug screening of potential ENaC modulators (Fig. 6b, Supplementary  
187 Video 2), further validating the suitability of the ASC *Opened* HIOs for drug screening and  
188 evaluation of modulator efficacy (Fig. 6c).

189

190 Previously, the *opened* organoid model was applied to murine intestinal organoids in order to  
191 determine the activity of the sodium dependent amino acid transporter, SLC6A14 (12).  
192 SLC6A14 is a sodium and chloride dependent electrogenic amino acid transporter expressed in  
193 the airway, intestinal, and colonic epithelial tissues. SLC6A14 mediates the uptake of cationic  
194 and neutral amino acids along with two sodium ions and one chloride ion, generating one net  
195 positive charge translocation and membrane depolarization per amino acid transport (12, 22).  
196 Through application of a low sodium/chloride extracellular gradient, SLC6A14 mediated  
197 depolarization could also be measured in *Opened* iPSC differentiated HIOs (Fig. 6d). In the  
198 presence of low extracellular sodium and chloride, the addition of arginine (L-Arg) to the apical  
199 surface of these *opened* organoids evokes apical membrane depolarization in both CF and MC  
200 HIOs. As expected on the basis of previous studies, this signal was abolished by the addition of  
201 the SLC6A14 blocker,  $\alpha$ -Methyl-DL-tryptophan ( $\alpha$ -MT) (Fig. 6d-6f) (22). The stimulation with  
202 acute L-Arg treatment and specific absence of stimulation with L-Arg and  $\alpha$ -MT suggests  
203 SLC6A14 amino acid uptake function can be measured using *opened* HIOs.

204

205 **Discussion:**

206

207 Stem cell-derived organoids have been employed to advance CF therapy development (2, 4, 6).  
208 Evidence for a positive effect of CFTR modulatory compounds on luminal swelling by CF  
209 patient-derived primary rectal organoids has been proposed as a potential diagnostic tool to  
210 inform personalized medical treatment. In the current work, we described novel methods for  
211 studying ion channels and transporters in the apical membrane of patient-specific, iPSC-derived  
212 intestinal organoids. In contrast to the widely used, organoid swelling assay of CFTR channel  
213 function and previously described 2D monolayer models (2, 7), opened organoids enable the  
214 functional measurement of electrogenic apical membrane proteins beyond CFTR using a  
215 fluorescence-based assay of membrane potential. We described how the membrane potential  
216 sensitive dye, FLIPR can be used to measure function of apical CFTR and ENaC channels as  
217 well as the electrogenic amino acid transporter, SLC6A14. Hence, multiple, disease-relevant,  
218 electrogenic membrane proteins can be interrogated in the same patient-derived tissue. With  
219 these innovations, we have expanded the potential application of CF organoid models to include  
220 therapy testing for multiple therapeutic targets.

221

222 In addition to its potential application to the study of multiple apical membrane constituents, this  
223 assay system is suitable for high-throughput screening and potential drug discovery. The Apical  
224 Chloride Conductance (ACC) and Apical Sodium Conductance (ASC) assays of patient-derived  
225 tissues exhibit excellent reproducibility with Z' factor scores of 0.529 and 0.573, respectively.  
226 Because of the capacity of this platform for profiling multiple small molecule combinations  
227 simultaneously, we found that phosphodiesterase inhibitors, could be used as a companion  
228 therapy in combination with ORKAMBI™ to boost F508del-CFTR chloride channel activity to  
229 levels comparable to that achieved by the new triple modulator combination, TRIKAFTA™.  
230 Therefore, the *opened* organoid can serve as a tool in identifying alternative therapeutics for  
231 patients with limited access to TRIKAFTA™. Likewise, the *Opened* organoids also enabled the  
232 first evaluation of ENaC modulators in a high-throughput manner in human intestinal tissue.  
233 Since the functional expression of multiple channels and transporters can be detected in the  
234 *opened* organoid model, this provides the potential to investigate the coordinated regulation of  
235 SLC6A14, CFTR, and ENaC, studies that are not feasible in the closed 3D system (23).  
236 Together, the *opened* organoids have the potential for identifying potential ENaC modulators in



237 a high-throughput format which can be further investigated and characterized using  
238 electrophysiological ussing studies.

239

240 Our previous studies have demonstrated SLC6A14 amino acid transporter function is able to  
241 augment Wt-CFTR and F508del-CFTR channel function in primary mouse colonic organoids  
242 (12). Here, we show that SLC6A14 is functionally expressed in both iPSC differentiated CF  
243 F508del and MC *opened* organoids. SLC6A14 has been shown in mouse colonic organoids to  
244 mediate F508del-CFTR fluid secretion function through uptake of L-Arg leading to activation of  
245 the Nitric Oxide pathway (12). Hence, future studies can focus on studying the potential impact  
246 of modulators of SLC6A14 on the functional rescue of F508del-CFTR to mediate CF intestinal  
247 disease.

248

249 iPSCs have the potential for the differentiation of multiple CF-affected tissues, including the  
250 airways, intestines, bile duct and pancreas (4, 9, 24-26). In our proof-of-concept studies, the  
251 opened organoids enabled the functional output measurement of multiple membrane channels  
252 in iPSC differentiated *opened* CF HIOs and mutation corrected, Wt-CFTR expressing, isogenic  
253 HIOs. Patient derived iPSCs provides the opportunities for simultaneous *in vitro* multi-tissue  
254 differentiation from individual CF patients to interrogate tissue specific disease pathologies.

255

256 In summary, we demonstrated the ability to detect the function of multiple apical membrane  
257 proteins in human tissues in a format suitable for in-depth analysis of ion channel regulation and  
258 interaction. The high-content and high-throughput capacity of this format will facilitate progress  
259 in understanding the impact of the membrane protein context on normal and mutant CFTR  
260 channel function.

261

262

263 **Methods and Materials:**

264

| <b>Organoids related reagents</b>           | <b>Source</b>         | <b>Catalog Identifier</b> |
|---------------------------------------------|-----------------------|---------------------------|
| Matrigel                                    | Corning               | CACB356231                |
| mTeSR1                                      | Stemcell Technologies | 5850                      |
| GCDR (Gentle Cell Dissociation Reagent)     | Stemcell Technologies | 7174                      |
| Activin-A                                   | R&D                   | 338-AC-050                |
| FGF4                                        | R&D                   | 235-F4-025                |
| Wnt 3A                                      | R&D                   | 5036-WN                   |
| Noggin                                      | R&D                   | 6057-NG                   |
| Rspondin                                    | R&D                   | 4645-RS                   |
| Epidermal growth factor                     | R&D                   | 236-EG                    |
| FGF10                                       | PeproTech             | 100-26                    |
| IntestiCult™ Organoid Growth Medium (Human) | Stemcell Technologies | 6010                      |

265

| <b>Common reagents</b>                            |                     |            |
|---------------------------------------------------|---------------------|------------|
| HBSS (Hank's Balanced Salt Solution)              | Wisent              | 311-513-CL |
| Calcein-Am                                        | Sigma-Aldrich       | 17783      |
| Advanced DMEM/F12                                 | Invitrogen          | 12634010   |
| EMEM, 1X                                          | Wisent              | 320-005-CL |
| FBS - (FETAL BOVINE SERUM)                        | Wisent              | 080-450    |
| Penicillin/Streptomycin Solution                  | Wisent              | 450-200-EL |
| Geneticin (G418 Sulfate)                          | Wisent              | 400-130-IG |
| Hygromycin B                                      | Thermofisher        | 10687010   |
| Puromycin Dihydrochloride                         | Thermofisher        | A1113802   |
| RPMI medium 1640                                  | Invitrogen          | 11875-093  |
| FLIPR® Membrane Potential Dye                     | Moleelcular Devices | R8042      |
| PBS (Phosphate-Buffered Saline)                   | Wisent              | 311-010-CL |
| Sodium Gluconate<br>(D-Gluconic acid sodium salt) | Sigma-Aldrich       | G9005      |
| NMDG (N-Methyl-D-glucamine)                       | Sigma-Aldrich       | M2004      |

|                                                                 |               |            |
|-----------------------------------------------------------------|---------------|------------|
| Gluconic acid lactone<br>(D-+)-Gluconic acid $\delta$ -lactone) | Sigma-Aldrich | G4750      |
| Potassium Gluconate                                             | Sigma-Aldrich | P1847      |
| NaCl (Sodium chloride)                                          | Sigma-Aldrich | S9888      |
| KCl (Potassium chloride)                                        | Sigma-Aldrich | P3911      |
| CaCl <sub>2</sub> (Calcium chloride)                            | Sigma-Aldrich | C1016      |
| MgCl <sub>2</sub> (Magnesium chloride)                          | Sigma-Aldrich | M8266      |
| BSA (Bovine Serum Albumin)                                      | Sigma-Aldrich | A1470      |
| Poly-L-Lysine (0.01% solution)                                  | Sigma-Aldrich | P4707      |
| Hepes                                                           | Bioshop       | HEP001.5   |
| cOmplete™, Protease Inhibitor Cocktail (Roche)                  | Sigma-Aldrich | 4693159001 |

266

|                                                |                               |              |
|------------------------------------------------|-------------------------------|--------------|
| <b>Modulators</b>                              |                               |              |
| Forskolin                                      | Sigma-Aldrich                 | F3917        |
| VX-770 (Ivacaftor)                             | Selleck Chemicals             | S1144        |
| VX-809 (Lumacaftor)                            | Selleck Chemicals             | S1565        |
| VX-661 (Tezacaftor)                            | Selleck Chemicals             | S7059        |
| VX-445 (Elexacaftor)                           | MedChemExpress                | HY-111772    |
| CFTRInh-172                                    | CF Foundation<br>Therapeutics |              |
| 8cGMP (8-bromo-Cyclic GMP)                     | Sigma-Aldrich                 | 15992        |
| GSNO (S-Nitroso-L-glutathione)                 | Cayman Chemicals              | 82240        |
| Milrinone                                      | Sigma-Aldrich                 | M4659        |
| Amiloride                                      | Spectrum Chemical             | TCI-A2599-5G |
| Benzamil hydrochloride hydrate                 | Sigma-Aldrich                 | B2417        |
| Phenamil methanesulfonate salt                 | Sigma-Aldrich                 | P203         |
| Arginine                                       | Sigma-Aldrich                 | A5006        |
| $\alpha$ -MT ( $\alpha$ -Methyl-DL-tryptophan) | Sigma-Aldrich                 | M8377        |

267

|                            |        |          |
|----------------------------|--------|----------|
| <b>RT-qPCR Reagents</b>    |        |          |
| RNeasy Plus Micro Kit      | Qiagen | 74004    |
| iScript cDNA Synthesis Kit | BioRad | 170-8891 |
| EvaGreen fluorophore       | BioRad | 58343    |

268

|                                          |  |  |
|------------------------------------------|--|--|
| (SsoFast EvaGreen Supermix with Low Rox) |  |  |
|------------------------------------------|--|--|

| <b>Antibodies</b>                                     |                     |          |
|-------------------------------------------------------|---------------------|----------|
| anti-Zona Occluden-1 (ZO-1)                           | Thermofisher        | 61-7300  |
| anti-E-cadherin                                       | Abcam               | ab133597 |
| anti-MUC2                                             | Abcam               | ab76774  |
| anti-Villin                                           | Abcam               | ab130751 |
| anti-CDX2                                             | Abcam               | ab76541  |
| anti-Calnexin                                         | Sigma-Aldrich       | C4731    |
| anti-CFTR                                             | UNC CFTR antibodies | 596      |
| anti-HA antibody ( $\alpha$ ENaC)                     | BioLegend           | 901503   |
| anti-Myc antibody ( $\beta$ ENaC)                     | Millipore           | 05-724   |
| anti-flag antibody ( $\gamma$ ENaC)                   | Cell Signaling      | 14793S   |
| DAPI (4',6-Diamidino-2-Phenylindole, Dihydrochloride) | Thermofisher        | D1306    |
| Alexa Fluor 594 Donkey anti-Rabbit IgG                | Thermofisher        | R37119   |
| Alexa Fluor 488 Polyclonal Antibody                   | Thermofisher        | R37114   |

269

| <b>Primer Sequences</b> |                                      |
|-------------------------|--------------------------------------|
| <i>CFTR</i>             | Fwd: 5'-CGGAGTGATAACACAGAAAGT-3'     |
| <i>CFTR</i>             | Rev: 5'-CAGGAACTGCTCTATTACAGAC-3'    |
| <i>Alpha-ENaC</i>       | Fwd: 5'-TTGACGTCTCCAACCTCACCG-3'     |
| <i>Alpha-ENaC</i>       | Rev: 5'-GGCAGAGGAGGACAAAGGTC-3'      |
| <i>SLC6A14</i>          | Fwd: 5'- GCTTGCTGGTTTGTTCATCACTCC-3' |
| <i>SLC6A14</i>          | Rev: 5'- TACACCAGCCAAGAGCAACTCC-3'   |
| <i>TBP</i>              | Fwd: 5'-CAAACCCAGAATTGTTCTCCTT-3'    |
| <i>TBP</i>              | Rev: 5'-ATGTGGTCTTCCTGAATCCCT-3'     |

270

271

272 **Cell culture:**

273 *iPSC intestinal organoid*

274 Human intestinal organoids were differentiated as previously described (10). In brief, iPSCs

275 were cultured on ESC qualified-Matrigel® coated 24 well plates in mTeSR1 media. At

276 approximately 60% confluency, differentiation to definitive endoderm was initiated through  
277 addition of Activin-A (100 ug/uL), for 3 days. Cultures were then exposed to hindgut endoderm  
278 differentiation media containing FGF4 (500 ng/mL) and Chiron99021 (3 uM) for 4 days. Post  
279 hindgut differentiation, budding immature organoids were collected and embedded into 50 uL  
280 solid Matrigel® drops. Spheroids were cultures for 30 days in previously established growth  
281 factor conditioned media (2). Organoids were passaged every 7-10 days and media was  
282 changed once every 3 days. To passage organoids, organoids were first collected in ice cold  
283 PBS and pelleted through centrifugation for 5 min at 300g, 4°C. Post centrifugation, excess  
284 PBS, Matrigel® and cellular debris was aspirated. The pelleted organoids were re-suspended in  
285 1 mL of GCDR and incubated at room temperature for 5 mins. With a P1000 pipettor, the  
286 organoids were fragmented through pipetting 40-60 times. Organoid fragments were then  
287 pelleted through centrifugation and re-suspended in fresh Matrigel® domes and seeded at a 1:3  
288 ratio. Growth factor conditioned medium was added to after allowing the Matrigel® to solidify at  
289 37°C for 35 mins.

290

#### 291 *MDCK and MDCK (tagged $\alpha\beta\gamma$ ENaC) cells:*

292 As previously described (20), both MDCK and MDCK (HA tagged- $\alpha$ ENaC, myc tagged- $\beta$ ENaC,  
293 flag tagged- $\gamma$ ENaC) cells are grown in DMEM media, supplemented with 10% FBS, 1%  
294 Penicillin/Streptomycin Solution and additional selection antibiotics (300µg/ml G418, 100µg/ml  
295 Hygromycin B, 2µg/ml Puromycin). MDCK cells are cultured in presence of Amiloride (10 µM).  
296 24 hours prior to ASC assay,  $\alpha$ ENaC expression in MDCK cells was induced with  
297 dexamethasone (1 µM) and sodium butyrate (10µM) to enhance protein expression of all ENaC  
298 subunits.

299

#### 300 **Swelling assay:**

301 iPSC derived organoids were isolated from the Matrigel® support using ice cold HBSS (Hank's  
302 Balanced Salt Solution) and pelleted through centrifugation. The cell pellet was re-suspended in  
303 HBSS containing 3 µM of live cell maker dye, Calcein-AM at 37°C for 45 mins. Excess dye was  
304 removed through centrifugation and organoids were resuspended in fresh HBSS for mouse  
305 colonic organoids or DMEM for human intestinal organoids. Organoid swelling was induced  
306 using Fsk at different concentrations as mentioned or in combination with CFTR potentiators.  
307 Mouse colonic organoid swelling was tracked for 30 mins and imaged at 5 mins intervals using  
308 fluorescence microscopy (Nikon Epifluorescence/Histology Microscope). Human intestinal  
309 organoid swelling as tracked for 4 hours and imaged at 15 mins intervals using confocal

310 microscopy (Nikon A1R Confocal Laser Microscope). Organoid swelling analysis was performed  
311 using Cell Profiler v3.1.

312  
313 Swelling images were analyzed using an in house developed algorithm. In brief. Images were  
314 exported as individual TIFF files and aligned using translation registration by cross-correlation.  
315 A histogram derived thresholding method (triangle) was used to identify specific organoids in the  
316 images. The center of the object masks was used to track individual organoids along the  
317 experiment. The differential organoid size at each time point was calculated by subtracting the  
318 size of the initial timepoint. Organoids that were not picked over the entirety of the swelling time  
319 course were excluded.

320

### 321 **Opened organoid cultures:**

322 Organoids were removed from the Matrigel® domes and collected in ice cold Advanced DMEM  
323 and pelleted through centrifugation. Pellets were then resuspended in growth factor conditioned  
324 medium and plated onto Poly-L-Lysine (0.01% solution) coated 96 well plates. Plates were  
325 coated following manufacture instructions. Media was changed one day post seeding. All  
326 functional studies were done two days after organoid plating.

327

### 328 **Membrane potential based functional assays:**

#### 329 *Apical Chloride Conductance (ACC) Assay for CFTR function*

330 The ACC assay was used to assess CFTR mediated changes in membrane depolarization  
331 using methods as previously described (16). In summary, split open primary rectal and iPSC  
332 derived intestinal organoids were incubated with zero sodium, chloride and bicarbonate buffer  
333 (NMDG 150 mM, Gluconic acid lactone 150 mM, Potassium Gluconate 3 mM, Hepes 10 mM,  
334 pH 7.42, 300 mOsm) containing 0.5 mg/ml of FLIPR® dye for 30 mins at 37°C. Wt-CFTR  
335 function in iPS cell derived gene edited organoids and primary rectal non-CF organoids was  
336 measured after acute addition of Fsk (10 µM) or 0.01% DMSO control. In iPS cell derived  
337 F508del CF organoids and primary rectal F508del organoids, cells were chronically rescued  
338 with corrector compounds for 24 hours (VX-809 (3 µM), VX-445/VX-661 (both, 3 µM), or DMSO  
339 control). Post drug rescue, F508del-CFTR function was measured after acute addition of Fsk  
340 (10 µM) and VX-770 (1 µM). Additional modulators (8cGMP, GSNO, Milrinone, and Tadalafil)  
341 were added during the FLIPR® dye loading process. CFTR functional recordings were  
342 measured using the FLIPR® Tetra High-throughput Cellular Screening System (Molecular  
343 Devices), which allowed for simultaneous image acquisition of the entire 96 well plate. Images

344 were first collected to establish baseline readings over 5 mins at 30 second intervals.  
345 Modulators were then added to stimulate CFTR mediated anion efflux. Post drug addition,  
346 CFTR mediated fluorescence changes were monitored and images were collected at 15 second  
347 intervals for 70 frames. CFTR channel activity was terminated with addition of Inh172 (10  $\mu$ M)  
348 and fluorescence changes were monitored at 30 second intervals for 25 frames.

349

#### 350 *Apical Sodium Conductance (ASC) Assay for ENaC function*

351 The ASC assay was used to assess ENaC inhibition upon amiloride addition through assessing  
352 changes in membrane hyperpolarization. Split open primary rectal and iPS derived intestinal  
353 organoids were incubated with a physiological sodium gluconate buffer (Sodium Gluconate  
354 150mM, Potassium Gluconate 3mM, Hepes 10 mM, pH 7.42, 300 mOsm), containing FLIPR®  
355 dye 0.5 mg/ml for 30 mins at 37°C (27). After dye loading, the plate was transferred to the  
356 FLIPR® Tetra High-throughput Cellular Screening System (Molecular Devices). Baseline  
357 readings were acquired for 5 mins at 30 sec intervals. In iPS cell derived MC organoids, ENaC  
358 inhibition was measured following acute addition of Amiloride (50  $\mu$ M or 10  $\mu$ M), Benamil (10  
359  $\mu$ M), Phenamil (10  $\mu$ M) or DMSO control. In primary rectal CF and non-CF organoids, ENaC  
360 inhibition was measured with acute addition of Amiloride (50  $\mu$ M) or DMSO control. ENaC  
361 mediated membrane hyperpolarization was tracked over time as loss in fluorescence signal  
362 over 70 mins at 60 sec intervals.

363

#### 364 *Apical Amino Acid Conductance (AAC) Assay for SLC6A14 function*

365 The AAC assay was used to measure SLC6A14 mediated acute uptake of Arginine leading to  
366 membrane depolarization. iPS cell derived gene edited organoids and F508del CF organoids  
367 (rescued chronically for 24 hours with VX-809, or DMSO control) were incubated in with a low  
368 sodium, low chloride buffer (NMDG 112.5 mM, Gluconic acid lactone 112.5 mM, NaCl 36.25  
369 mM, Potassium Gluconate 2.25 mM, KCl 0.75 mM, CaCl<sub>2</sub> 0.75 mM, MgCl<sub>2</sub> 0.5 mM, and HEPES  
370 10 mM, pH 7.42, 300 mOsm), containing FLIPR® dye 0.5 mg/ml for 40 mins at 37°C (17).  
371 During dye loading, organoids were treated with  $\alpha$ -MT (2 mM), or buffer control. After dye  
372 loading, the plate was transferred to the FLIPR® Tetra High-throughput Cellular Screening  
373 System (Molecular Devices) (22). Baseline readings were acquired for 5 mins at 30 sec  
374 intervals. Arginine (1 mM) was added acutely and change in fluorescence was recorded at 30  
375 sec intervals. SLC6A14 function in primary non-CF rectal organoids was measure with acute  
376 addition of Arginine (1 mM) and fluorescence measurements were collected as described  
377 above.

378

379 *Analysis and heatmap generation*

380 Experiments were exported as multi frame TIFF images of which every frame recorded the  
381 entire plate. Pixels outside of well areas were filtered out using the initial signal intensities and  
382 wells containing opened organoids were separated. All traces were normalized to the last point  
383 of the baseline intensity. Peak response for each pixel was calculated as the maximum  
384 deviation from baseline. During the stimulation segment, fluorescence intensity increased for  
385 CFTR and SLC6A14 function, and decreased for ENaC function. Heatmap representation was  
386 generated from the peak response of each pixel and the mean response trace of wells was  
387 generated by averaging the corresponding pixel traces.

388

389 **Real-time Quantitative PCR:**

390 As previously described (28), organoid samples were collected in ice cold Phosphate Buffered  
391 Saline and pelleted through centrifugation. Total mRNA from pelleted samples was extracted  
392 using RNeasy® Plus Micro Kit, following enclosed instructions. After measuring the  
393 spectrophotometric quality of extracted RNA through 260/280 ratios of 2.0 and 260/230 ratios of  
394 1.8-2.2, mRNA samples with concentrations greater than 300 ng/μL were used to reverse  
395 transcribe 1 μg of cDNA using iScript™ cDNA Synthesis Kit. Expression levels of target genes  
396 were measured using primers listed above using the FX96 Touch™ Real-Time PCR Detection  
397 System using the SYBR Green Master Mix containing the EvaGreen® fluorophore.

398

399 **Immunofluorescence:**

400 Samples were fixed and permeated with 100% methanol at -20° C for 10 mins. Post methanol  
401 incubation, samples were washed 3 times with PBS, 5 mins per wash at room temperature.  
402 Following the washes, samples were blocked using 4% BSA for 30 mins and incubated with  
403 primary antibody against Zona Occluden-1 (ZO-1) overnight. After removal of primary antibody,  
404 samples were wash 3 time with PBS, 5 mins per wash and incubated with secondary antibodies  
405 and nuclear marker DAPI for 1 hour. Samples were then washed 3 times with PBS, 5 mins per  
406 wash at room temperature. Confocal imaging was done using Nikon A1R Confocal Laser  
407 Microscope.

408

409 **Western blotting:**

410 Samples were collected in ice cold PBS and pelleted through centrifugation at 4°C (500g for 7  
411 mins). Post centrifugation, the cell pellet was re-suspended in 200μL of modified



412 radioimmunoprecipitation assay buffer (50 mM Tris-HCl, 150 mM NaCl, 1 mM EDTA, pH 7.4,  
413 0.2% (v/v) SDS and 0.1% (v/v) Triton X-100) containing a protease inhibitor cocktail for 10 min.  
414 After centrifugation at 13,000 rpm for 5 min, the soluble fractions were analyzed by SDS-PAGE  
415 on 6% Tris-Glycine gel. After electrophoresis, proteins were transferred to nitrocellulose  
416 membranes and incubated in 5% milk and CFTR bands were detected using the mAb 596.  
417 Calnexin (CNX) was used as a loading control and detected using a Calnexin-specific rAb  
418 (1:5000). The blots were developed with using the Li-Cor Odyssey Fc (LI-COR Biosciences,  
419 Lincoln, NE, USA) in a linear range of exposure (1-20 min). Relative levels of CFTR protein were  
420 quantitated by densitometry of immunoblots using ImageStudioLite (LI-COR Biosciences,  
421 Lincoln, NE, USA).

422

423 **Acknowledgements:** We would like to thank Jacqueline McCormack and Amy P Wong for their  
424 help in editing the manuscript. We would also like to thank Christopher Fladd and SPARC  
425 BioCentre at the Hospital for Sick Children for help in conducting the organoid swelling assays.

426

427 **Funding:** S.X. was supported by the Canadian Association of Gastroenterology (CAG)  
428 PhD Scholarship. iPSC cells were obtained through the CF Canada-Sick Kids Program for  
429 Individualized CF Therapy (CFIT). This work was supported by the CFIT Program with funding  
430 provided by CF Canada and the Sick Kids Foundation. This work was funded by the  
431 Government of Canada through Genome Canada and the Ontario Genomics Institute (OGI-  
432 148). This study was funded by the Government of Ontario.

433

434 **Author Contributions:** S.X., S.A., and C.E.B. conceptualization and experimental design. S.X.,  
435 B.Z., O.L., M.D., and C.J. performed experiments and data analysis. J.J., and A.P. cultured and  
436 differentiated iPSC organoids. S.X., and C.E.B. wrote the manuscript. R.D., C.N.M., N.L.J., and  
437 C.E.B. reviewed and revised the manuscript. All authors have read and  
438 agreed to the published version of the manuscript.

439

440 **Conflict of interest:** The authors declare no competing interests.

441 **References:**

442

- 443 1. Sato T, Vries RG, Snippert HJ, van de Wetering M, Barker N, Stange DE, et al. Single Lgr5  
444 stem cells build crypt-villus structures in vitro without a mesenchymal niche. *Nature*.  
445 2009;459(7244):262-5.
- 446 2. Dekkers JF, Wiegerinck CL, de Jonge HR, Bronsveld I, Janssens HM, de Winter-de Groot  
447 KM, et al. A functional CFTR assay using primary cystic fibrosis intestinal organoids. *Nat Med*.  
448 2013;19(7):939-45.
- 449 3. Watson CL, Mahe MM, Munera J, Howell JC, Sundaram N, Poling HM, et al. An in vivo  
450 model of human small intestine using pluripotent stem cells. *Nat Med*. 2014;20(11):1310-4.
- 451 4. Mithal A, Capilla A, Heinze D, Berical A, Villacorta-Martin C, Vedaie M, et al. Generation  
452 of mesenchyme free intestinal organoids from human induced pluripotent stem cells. *Nat*  
453 *Commun*. 2020;11(1):215.
- 454 5. Merkert S, Schubert M, Olmer R, Engels L, Radetzki S, Veltman M, et al. High-  
455 Throughput Screening for Modulators of CFTR Activity Based on Genetically Engineered Cystic  
456 Fibrosis Disease-Specific iPSCs. *Stem Cell Reports*. 2019;12(6):1389-403.
- 457 6. Dekkers JF, Berkens G, Kruisselbrink E, Vonk A, de Jonge HR, Janssens HM, et al.  
458 Characterizing responses to CFTR-modulating drugs using rectal organoids derived from  
459 subjects with cystic fibrosis. *Sci Transl Med*. 2016;8(344):344ra84.
- 460 7. Zomer-van Ommen DD, de Poel E, Kruisselbrink E, Oppelaar H, Vonk AM, Janssens HM,  
461 et al. Comparison of ex vivo and in vitro intestinal cystic fibrosis models to measure CFTR-  
462 dependent ion channel activity. *J Cyst Fibros*. 2018;17(3):316-24.
- 463 8. Moore PJ, Tarran R. The epithelial sodium channel (ENaC) as a therapeutic target for  
464 cystic fibrosis lung disease. *Expert Opin Ther Targets*. 2018;22(8):687-701.
- 465 9. Spence JR, Mayhew CN, Rankin SA, Kuhar MF, Vallance JE, Tolle K, et al. Directed  
466 differentiation of human pluripotent stem cells into intestinal tissue in vitro. *Nature*.  
467 2011;470(7332):105-9.
- 468 10. McCracken KW, Howell JC, Wells JM, Spence JR. Generating human intestinal tissue  
469 from pluripotent stem cells in vitro. *Nat Protoc*. 2011;6(12):1920-8.
- 470 11. Kopeikin Z, Yuksek Z, Yang HY, Bompadre SG. Combined effects of VX-770 and VX-809 on  
471 several functional abnormalities of F508del-CFTR channels. *J Cyst Fibros*. 2014;13(5):508-14.
- 472 12. Ahmadi S, Xia S, Wu YS, Di Paola M, Kissoon R, Luk C, et al. SLC6A14, an amino acid  
473 transporter, modifies the primary CF defect in fluid secretion. *Elife*. 2018;7.
- 474 13. Veit G, Roldan A, Hancock MA, Da Fonte DF, Xu H, Hussein M, et al. Allosteric folding  
475 correction of F508del and rare CFTR mutants by elexacaftor-tezacaftor-ivacaftor (Trikafta)  
476 combination. *JCI Insight*. 2020;5(18).
- 477 14. McClure ML, Barnes S, Brodsky JL, Sorscher EJ. Trafficking and function of the cystic  
478 fibrosis transmembrane conductance regulator: a complex network of posttranslational  
479 modifications. *Am J Physiol Lung Cell Mol Physiol*. 2016;311(4):L719-L33.
- 480 15. Pankow S, Bamberger C, Yates JR, 3rd. A posttranslational modification code for CFTR  
481 maturation is altered in cystic fibrosis. *Sci Signal*. 2019;12(562).
- 482 16. Ahmadi S, Bozoky Z, Di Paola M, Xia S, Li C, Wong AP, et al. Phenotypic profiling of CFTR  
483 modulators in patient-derived respiratory epithelia. *NPJ Genom Med*. 2017;2:12.

- 484 17. Wu YS, Jiang J, Ahmadi S, Lew A, Laselva O, Xia S, et al. ORKAMBI-Mediated Rescue of  
485 Mucociliary Clearance in Cystic Fibrosis Primary Respiratory Cultures Is Enhanced by Arginine  
486 Uptake, Arginase Inhibition, and Promotion of Nitric Oxide Signaling to the Cystic Fibrosis  
487 Transmembrane Conductance Regulator Channel. *Mol Pharmacol*. 2019;96(4):515-25.
- 488 18. Steagall WK, Drumm ML. Stimulation of cystic fibrosis transmembrane conductance  
489 regulator-dependent short-circuit currents across DeltaF508 murine intestines.  
490 *Gastroenterology*. 1999;116(6):1379-88.
- 491 19. Bhalla V, Hallows KR. Mechanisms of ENaC regulation and clinical implications. *J Am Soc*  
492 *Nephrol*. 2008;19(10):1845-54.
- 493 20. Lu C, Pribanic S, Debonneville A, Jiang C, Rotin D. The PY motif of ENaC, mutated in  
494 Liddle syndrome, regulates channel internalization, sorting and mobilization from subapical  
495 pool. *Traffic*. 2007;8(9):1246-64.
- 496 21. Hirsh AJ, Sabater JR, Zamurs A, Smith RT, Paradiso AM, Hopkins S, et al. Evaluation of  
497 second generation amiloride analogs as therapy for cystic fibrosis lung disease. *J Pharmacol Exp*  
498 *Ther*. 2004;311(3):929-38.
- 499 22. Di Paola M, Park AJ, Ahmadi S, Roach EJ, Wu YS, Struder-Kypke M, et al. SLC6A14 Is a  
500 Genetic Modifier of Cystic Fibrosis That Regulates *Pseudomonas aeruginosa* Attachment to  
501 Human Bronchial Epithelial Cells. *mBio*. 2017;8(6).
- 502 23. Butterworth MB, Edinger RS, Johnson JP, Frizzell RA. Acute ENaC stimulation by cAMP in  
503 a kidney cell line is mediated by exocytic insertion from a recycling channel pool. *J Gen Physiol*.  
504 2005;125(1):81-101.
- 505 24. Ogawa M, Ogawa S, Bear CE, Ahmadi S, Chin S, Li B, et al. Directed differentiation of  
506 cholangiocytes from human pluripotent stem cells. *Nat Biotechnol*. 2015;33(8):853-61.
- 507 25. Simsek S, Zhou T, Robinson CL, Tsai SY, Crespo M, Amin S, et al. Modeling Cystic Fibrosis  
508 Using Pluripotent Stem Cell-Derived Human Pancreatic Ductal Epithelial Cells. *Stem Cells Transl*  
509 *Med*. 2016;5(5):572-9.
- 510 26. Wong AP, Bear CE, Chin S, Pasceri P, Thompson TO, Huan LJ, et al. Directed  
511 differentiation of human pluripotent stem cells into mature airway epithelia expressing  
512 functional CFTR protein. *Nat Biotechnol*. 2012;30(9):876-82.
- 513 27. Chen MX, Gatfield K, Ward E, Downie D, Sneddon HF, Walsh S, et al. Validation and  
514 optimization of novel high-throughput assays for human epithelial sodium channels. *J Biomol*  
515 *Screen*. 2015;20(2):242-53.
- 516 28. Laselva O, Stone TA, Bear CE, Deber CM. Anti-Infectives Restore ORKAMBI((R)) Rescue of  
517 F508del-CFTR Function in Human Bronchial Epithelial Cells Infected with Clinical Strains of *P.*  
518 *aeruginosa*. *Biomolecules*. 2020;10(2).
- 519
- 520

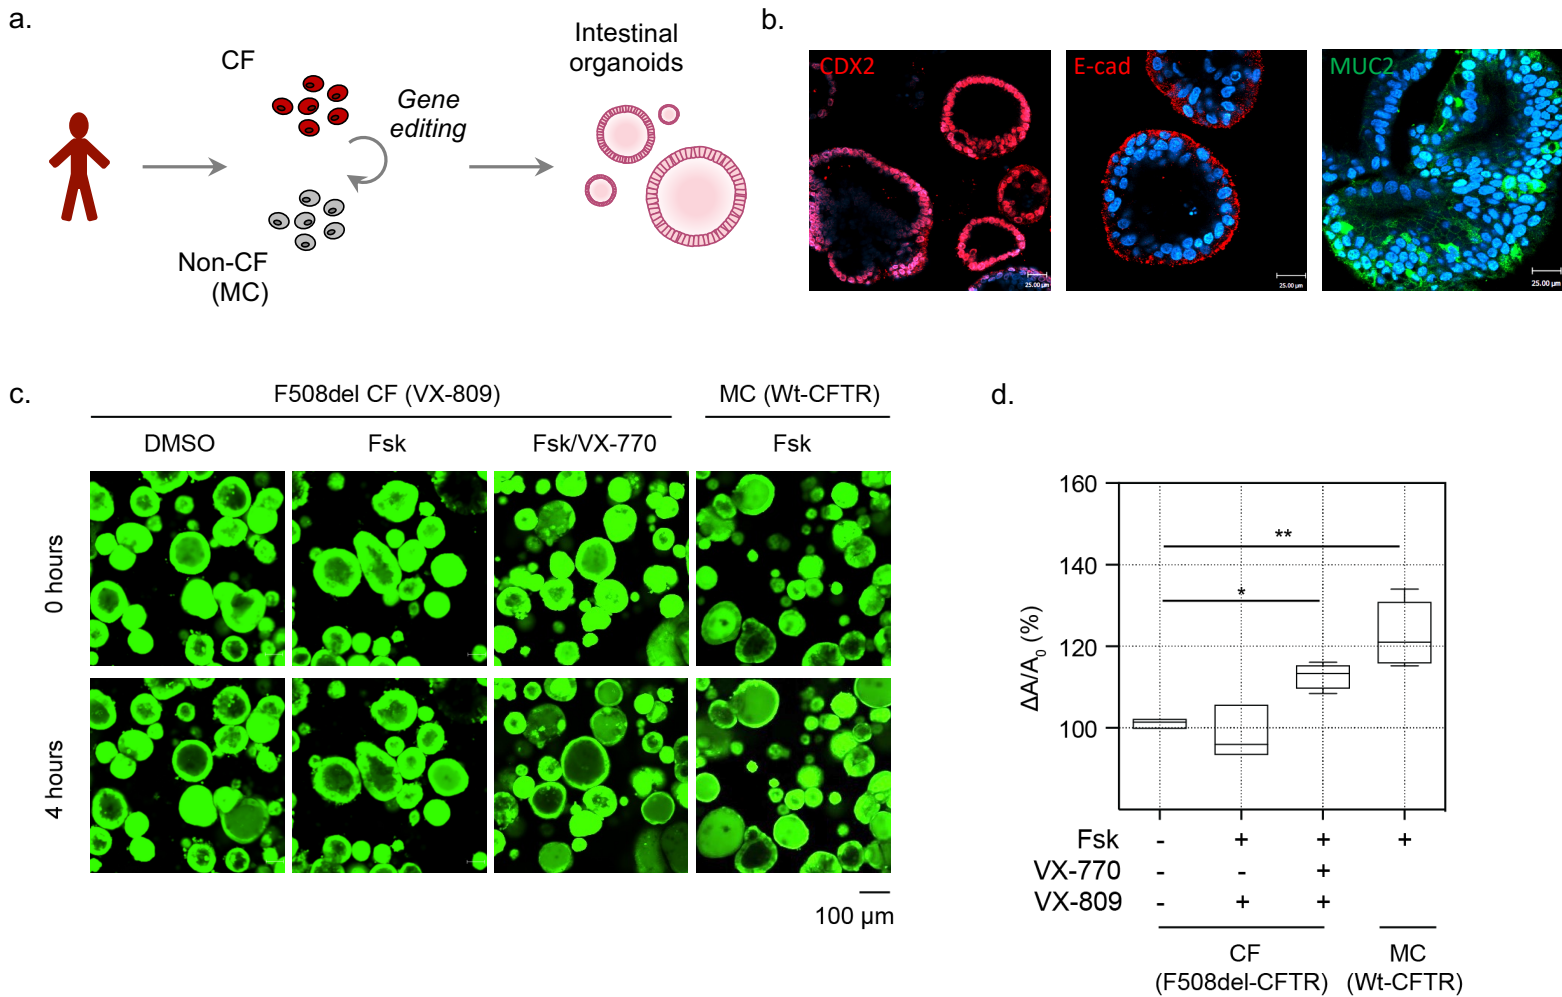

521 **Figure 1: iPSC-derived HIOS can be used to measure function of Wt-CFTR and**  
522 **pharmacologically rescued F508del-CFTR as Fsk induced organoid swelling. a.** Schematic  
523 depicting generation of 3D homozygous F508del CF and isogenic, Mutation Corrected (MC)  
524 intestinal organoids from iPSCs. **b.** Characterization of iPSC derived intestinal organoids.  
525 Immunofluorescence studies of hPSC derived intestinal organoids highlighting expression of  
526 intestinal cell markers CDX2 (red, intestinal marker), E-cadherin (red, epithelial cell), and MUC2  
527 (green, goblet cell). **c.** Representative images of forskolin induced swelling of F508del-CFTR  
528 expressing CF organoids or Wt-CFTR expressing Mutations Corrected (MC) organoids. CF  
529 organoids were rescued chronically (24 hrs) with DMSO control or VX-809 (3  $\mu$ M) and acutely  
530 stimulated with Fsk (10  $\mu$ M) or Fsk and VX-770 (1  $\mu$ M). **d.** Bar graph shows the change in  
531 organoid size post Fsk induced swelling ( $\Delta A$ ) relative to average organoid size at baseline ( $A_0$ )  
532 (mean  $\pm$  SEM). (\*P = 0.0191, \*\* P = 0.0065, n  $\geq$  3 biological replicates. Each biological replicate  
533 = independent organoid passage, technical replicate = average of >30 organoids).  
534

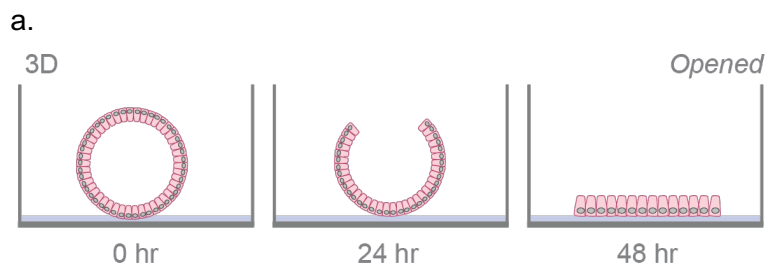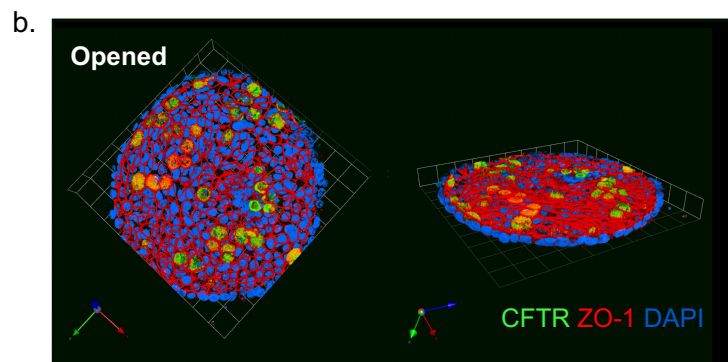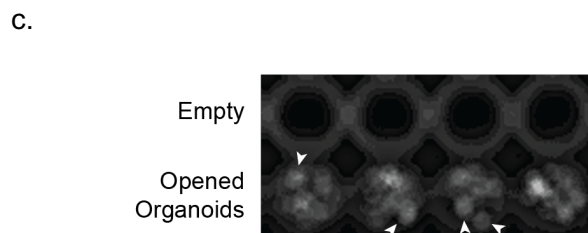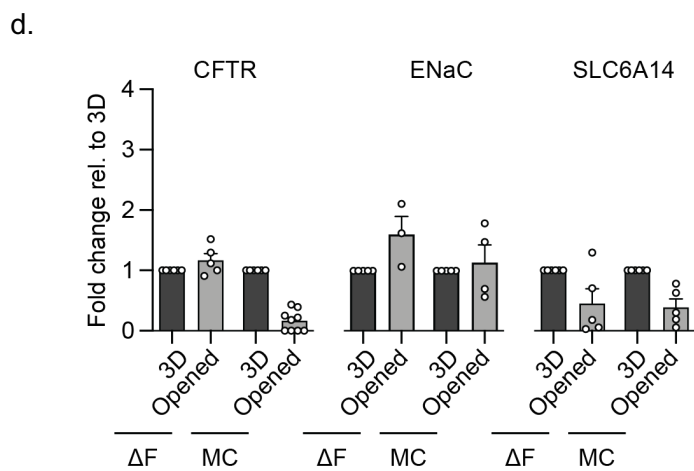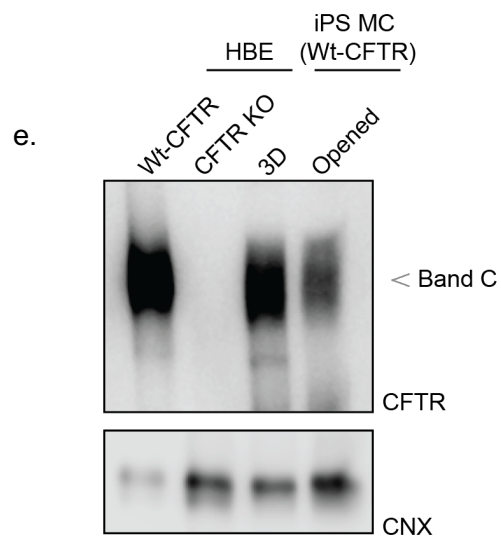

535 **Figure 2: Characterization of *opened* and 3D iPSC-HIOs.** **a.** Schematic depicting generation  
536 of opened organoids with the removal of the extracellular supporting matrix. **b.**  
537 Immunofluorescence of CFTR (green), apical membrane marker, ZO-1 (red), and nuclei (blue) in  
538 *opened* isogenic non-CF organoids. **c.** Representative raw FLIPR fluorescence image of  
539 *opened* organoids, with each object (arrowhead) as an opened organoid. **c.** Gene expression  
540 RT-qPCR studies of CFTR and ENaC and SLC6A14 in opened organoids relative to 3D  
541 organoid expression. **d.** Western blot of WT-CFTR expression in 3D and opened, mutation  
542 corrected organoids, compared to expression in HBE cell line and HBE CFTR knockout cell  
543 lines.  
544

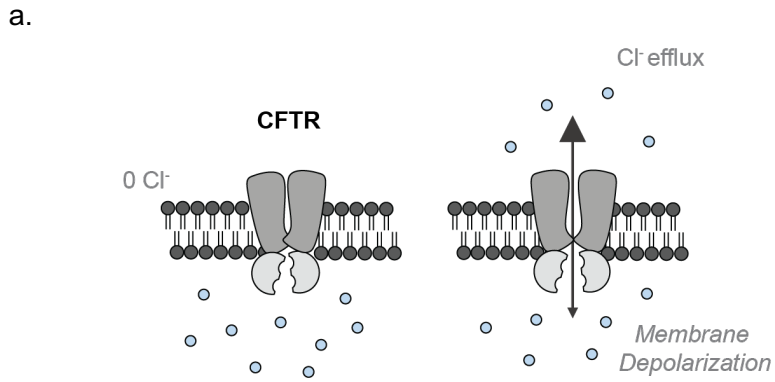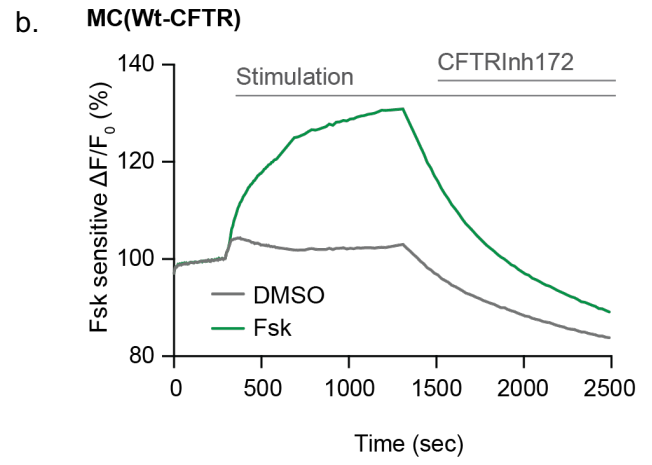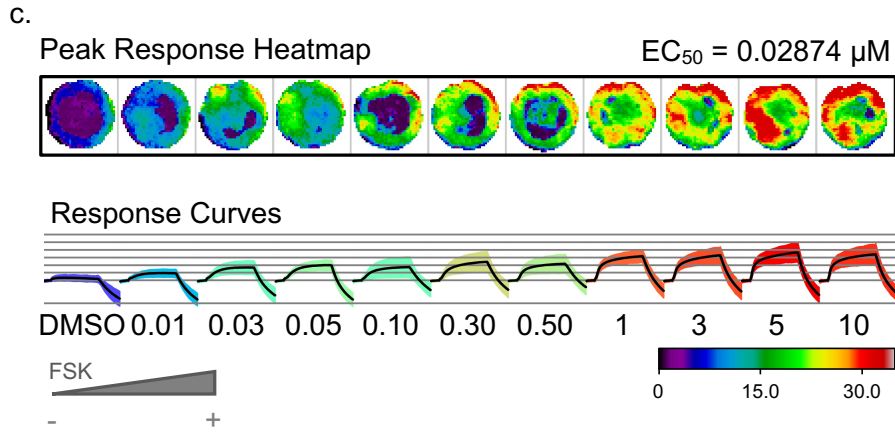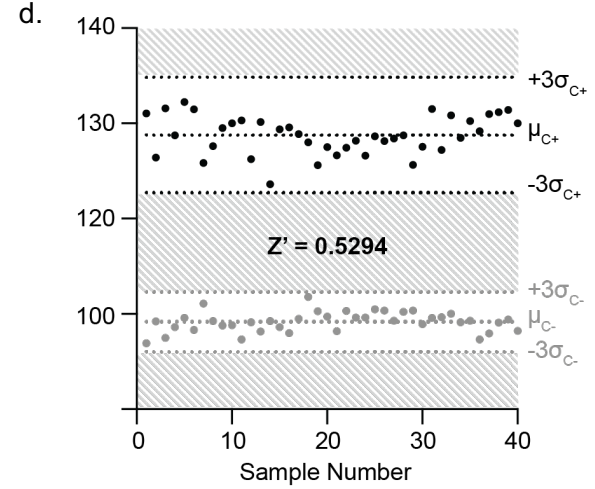



545 **Figure 3: Opened iPSC-HIOs enable direct measurements of Wt-CFTR function in a high**  
546 **throughput format. a.** Schematic depicting the Apical Chloride Conductance (ACC) assay (13).  
547 *Opened* MC iPSC-HIOs are placed in a zero-chloride extracellular buffer. Upon addition with  
548 Fsk, CFTR mediated chloride efflux leads to increase in membrane potential and the  
549 subsequent increase in fluorescence, signal is terminated with acute treatment of CFTRInh172.  
550 **b.** Representative trace of Wt-CFTR function measured in MC organoids expressing Wt-CFTR.  
551 *Opened* organoids stimulated with Fsk (10  $\mu$ M). CFTR response was terminated with  
552 CFTRinh172 (10  $\mu$ M). **c.** Peak responses heatmaps and response curves of opened MC  
553 organoids stimulated with increasing concentrations of Fsk. **d.** Bland-Altman plot depicting  
554 reproducibility of stimulated CFTR response. Black points measuring maximum change in  
555 fluorescence changes with acute Fsk stimulation in comparison to grey points representing  
556 DMSO control.  
557

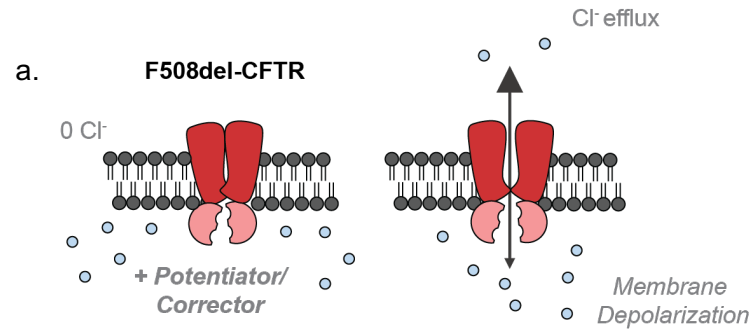

b. **CF(F508del-CFTR)**

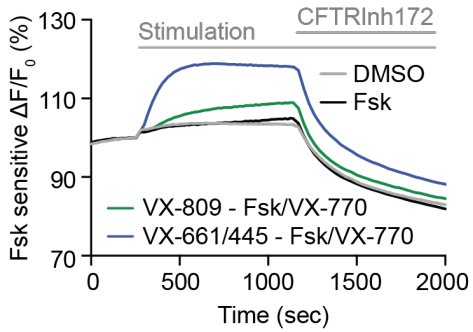

c.

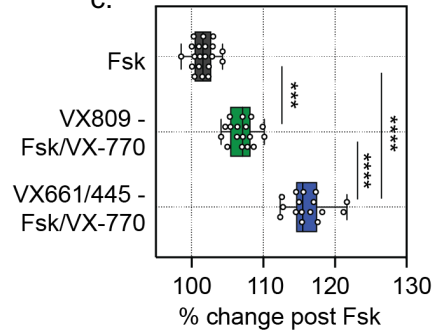

d. **DMSO** **Fsk**

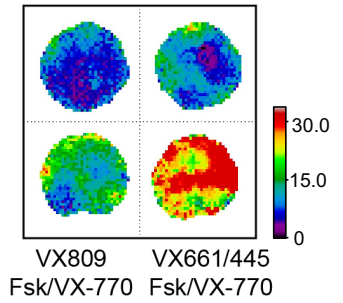

e.

|     | <b>Compound</b>         | <b>Class</b>              |
|-----|-------------------------|---------------------------|
| (1) | 8cGMP (10 $\mu$ M)      | <b>cGMP analog</b>        |
| (2) | GSNO (10 $\mu$ M)       | <b>Nitric Oxide donor</b> |
| (3) | Milrinone (100 $\mu$ M) | <b>PDE3 inhibitor</b>     |
| (4) | Tadalafil (100 $\mu$ M) | <b>PDE5 inhibitor</b>     |

f.

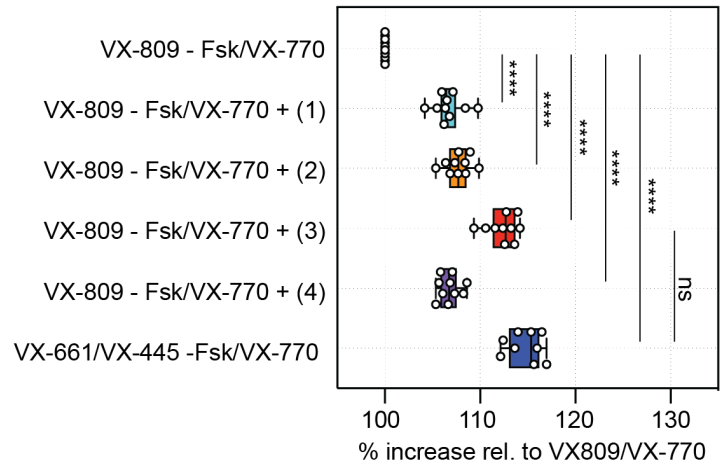

558 **Figure 4: Opened CF HIOs can model defective CFTR function and response to CF**  
559 **modulators. a.** Schematic depicting functional measurement of F508del-CFTR using the ACC  
560 assay. **b.** Representative traces of F508del-CFTR response to pharmacological rescue in  
561 *opened* CF organoids. *Opened* F508del CF organoids were chronically (24 hr) rescued with VX-  
562 809 (3  $\mu$ M), VX-445 (3  $\mu$ M)/VX-661 (3  $\mu$ M) or DMSO as control and acute stimulation with Fsk  
563 (10  $\mu$ M)/VX-770 (1  $\mu$ M) or Fsk (10  $\mu$ M)/VX-770 (1  $\mu$ M). **c.** Box and whisker plot and **d.** Peak  
564 response heatmaps of F508del-CFTR response to pharmacological rescue in opened CF  
565 organoids. *Opened* iPSC-derived F508del CF organoids were chronically (24 hr) rescued with  
566 VX-809 (3  $\mu$ M), VX-445 (3  $\mu$ M)/VX-661 (3  $\mu$ M) or DMSO as control and acute stimulation with  
567 Fsk (10  $\mu$ M) or Fsk (10  $\mu$ M)/VX-770 (1  $\mu$ M) (\*\* $P$  = 0.004, \*\*\*\* $P$  < 0.001,  $n$  > 3 biological  
568 replicates,  $n$  = 3 technical replicates). **e.** Table of compounds tested in combination with  
569 Fsk/VX-770 and VX-809. **f.** Box plot shows F508del CFTR stimulation peak response post  
570 chronic rescue with VX-809 (3  $\mu$ M) and acute drug treatment with the listed phosphodiesterase  
571 inhibitors and Fsk (10  $\mu$ M)/VX-770 (1  $\mu$ M) \*\*\*\* $P$  < 0.0001,  $n$  = 3 biological replicates,  $n$  = 3  
572 technical replicates. Each biological replicate = independent organoid passage, technical  
573 replicate = 1 well of 96 well plate).  
574

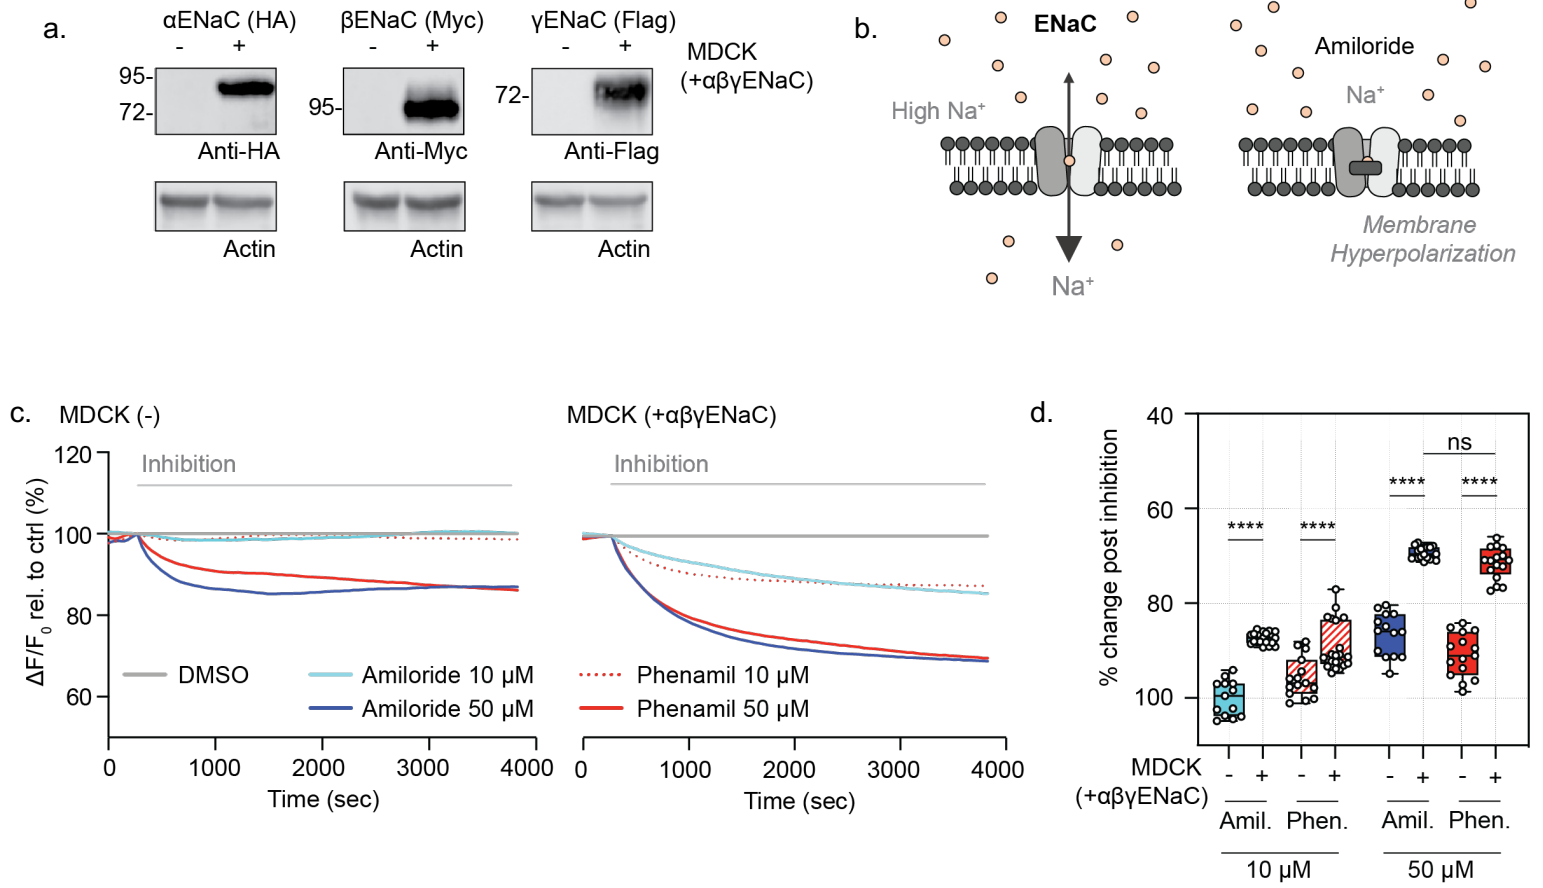

575 **Figure 5: Validation of ENaC function in ENaC over expression MDCK cell line. a.** ENaC  
576 subunit expression in MDCK cells that are stably transfected compared to parental  
577 (untransfected) MDCK control cells. Western blot detection of  $\alpha$ ENaC,  $\beta$ ENaC, or  $\gamma$ ENaC, with  
578 anti-HA, anti-Myc or anti-flag antibodies, respectively. **b.** Schematic depicting ENaC inhibition in  
579 the novel Apical Sodium Conductance assay (ASC). In presence of the high extracellular  
580 sodium, acute addition of amiloride and amiloride analogues result in ENaC inhibition and  
581 relative membrane hyperpolarization, which is detected as decrease fluorescence signal. **c.**  
582 Representative traces and **d.** box and whisker plot of ENaC inhibition in MDCK cells and MDCK  
583 cells over expressing triple epitope tagged  $\alpha\beta\gamma$ ENaC with amiloride and amiloride analogue,  
584 phenamil amiloride (10  $\mu$ M and 50  $\mu$ M) relative to DMSO control (\*\*\*\* P > 0.0001, n = 4  
585 biological replicates, n  $\geq$  4 technical replicates).  
586

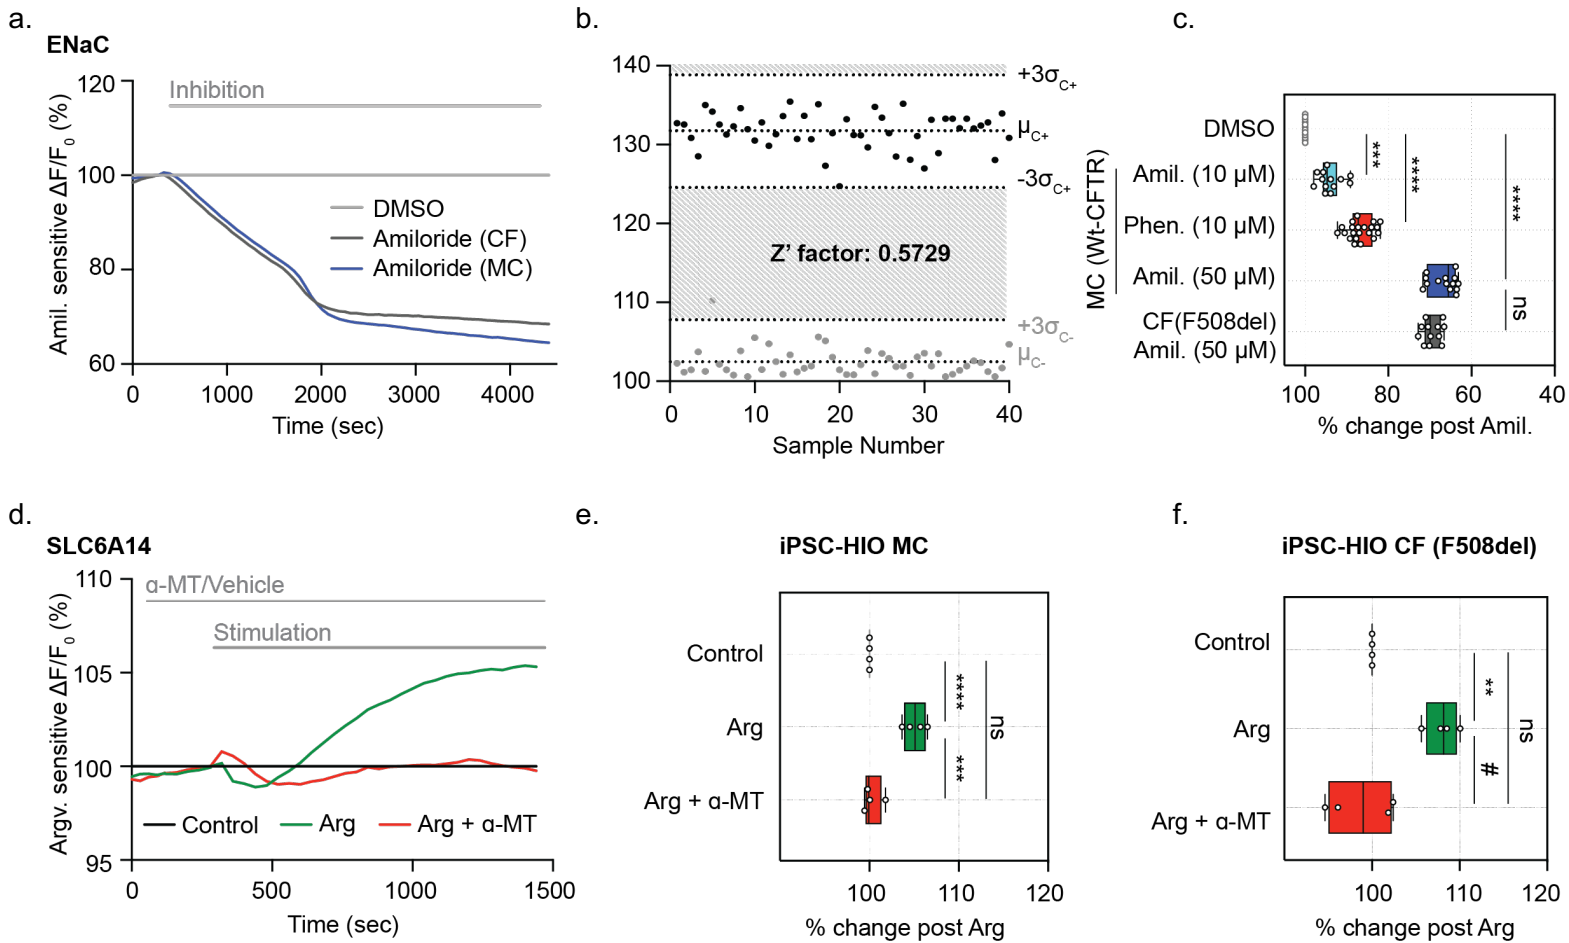

587 **Figure 6: Opened iPSC differentiated HIOs enables high throughput assessment of ENaC**  
588 **specific function, response to ENaC modulators and measurement of SLC6A14 activity.**  
589 **a.** Representative ENaC inhibition in *opened* F508del CF and MC organoids with acute  
590 treatment with Amiloride (50  $\mu$ M). **b.** Bland-Altman Plot depicting the reproducibility of ENaC  
591 inhibition with amiloride treatment. Black points measuring maximum inhibition in fluorescence  
592 changes with acute amiloride treatment in comparison to grey points representing DMSO  
593 control. **c.** Box and whisker plot shows ENaC inhibition with acute treatment with amiloride (10  
594  $\mu$ M and 50  $\mu$ M), or Phenamil, (all 10  $\mu$ M) in opened iPSC MC HIOs organoids (\*\* $P = 0.0002$ ,  
595 \*\*\*\*  $P > 0.0001$ ,  $n > 3$  biological replicates,  $n > 3$  technical replicates). **d.** Representative trace of  
596 SLC6A14 activity in opened iPSC MC HIOs organoids pretreated with either vehicle control or  
597 specific inhibitor,  $\alpha$ -MT (2 mM). Opened CF and MC organoids were acutely treated with Arg (1  
598 mM). **e.** Box and whisker plot of SLC6A14 function with acute treatment with Arg (1 mM) in  
599 iPSC MC HIOs. SLC6A14 activity was inhibited with pretreatment of specific inhibition  $\alpha$ -MT (2  
600 mM) (\*\* $P = 0.0001$ , \*\*\*\*  $P > 0.0001$ ,  $n = 4$  biological replicates,  $n = 3$  technical replicates). **f.**  
601 Box and whisker plot shows SLC6A14 activity with acute treatment with Arg (1 mM) or in  
602 presence of specific inhibitor  $\alpha$ -MT (2 mM) in iPSC CF HIOs (\*\*  $P = 0.0080$ , #  $P = 0.0023$ ,  $n = 3$   
603 biological replicates,  $n = 3$  technical replicates).  
604

## SUPPLEMENTARTY



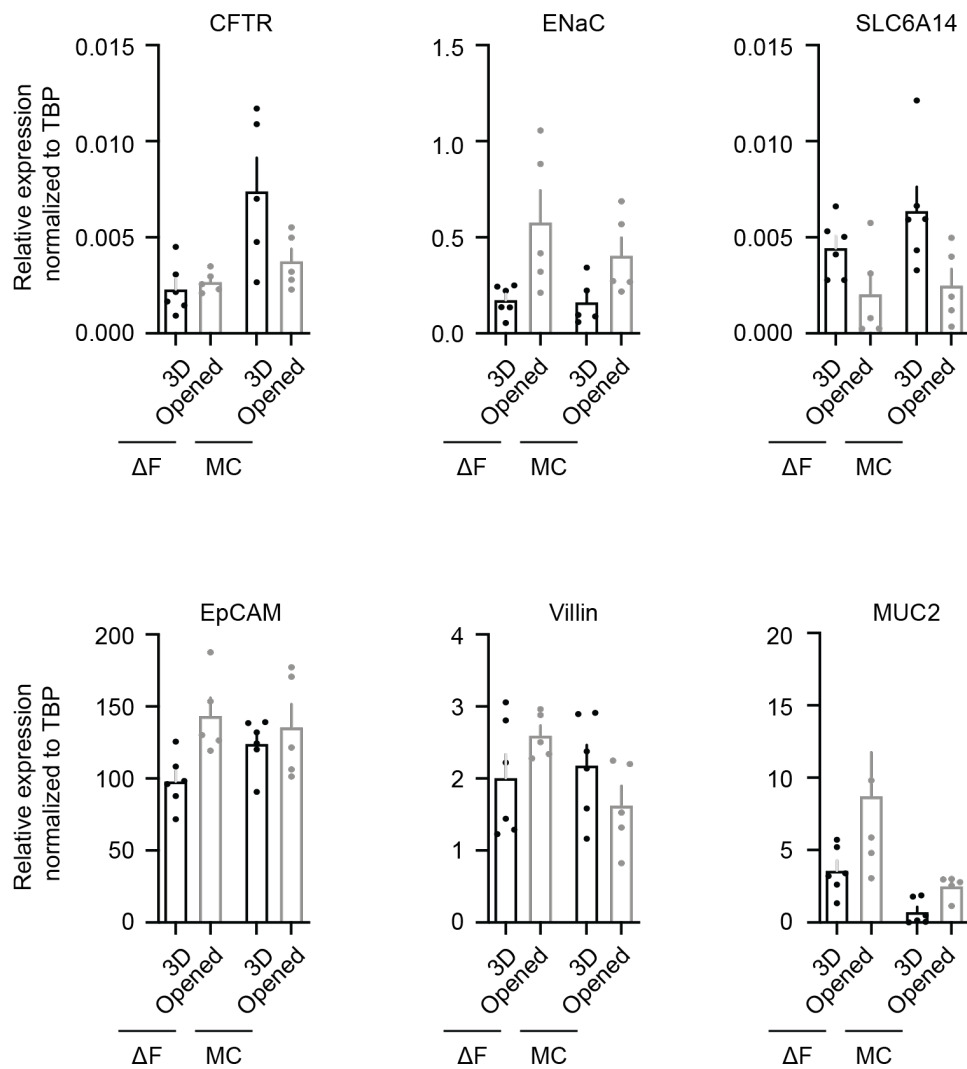

**Supplementary Figure 1: Gene expression studies on iPS derived HIOs.** Expression of intestinal apical membrane ion channels (CFTR and ENaC), amino acid transporter (SLC6A14), epithelial cell marker (EpCAM), intestinal epithelial cell marker (Villin) and goblet cells marker (MUC2), relative to house keeping gene *TBP*, in CF and MC organoids in 3D and opened formats using RT-qPCR.

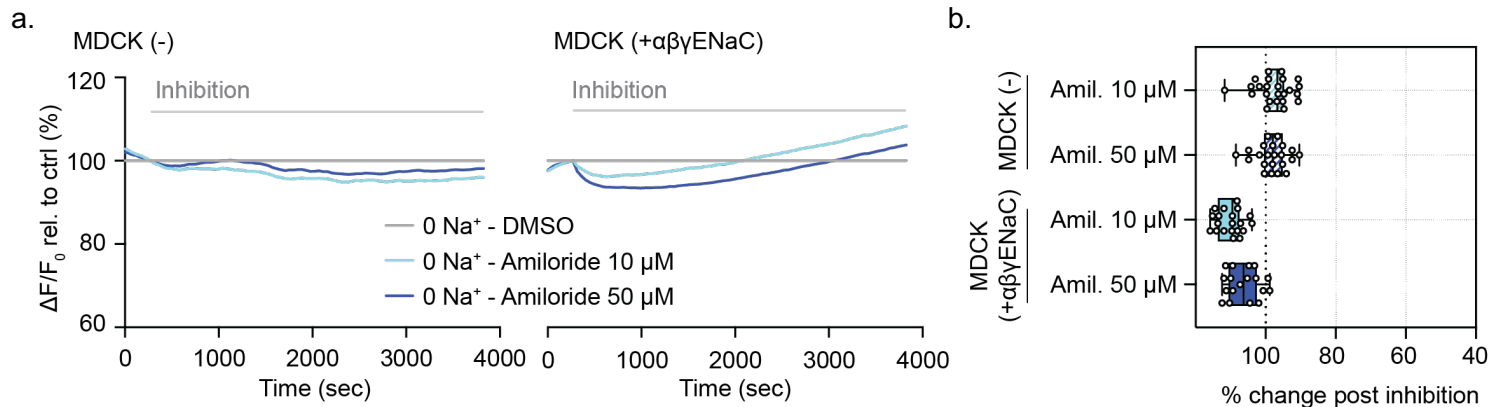

**Supplementary Figure 2: Functional validation of ENaC activity measured in MDCK cells.** a. Representative traces and b. box and whisker plot of parental MDCK control cells or MDCK cells expressing  $\alpha\beta\gamma$ ENaC acutely treated with amiloride (10 $\mu$ M or 50 $\mu$ M) in presence and absence of 140mM extracellular sodium (\*\*\*\* P < 0.001, n > 3 biological replicates, n = 3 technical replicates ).
